# Supplementary material for: Identification of Structural Features of Condensed Tannins That Affect Protein Aggregation
Source: PubMed Central journal article supplement (PMC5268436; doi:10.1371/journal.pone.0170768), 2017-01-26
Supplement: pone.0170768.s001.pdf [file pone.0170768.s001.pdf]

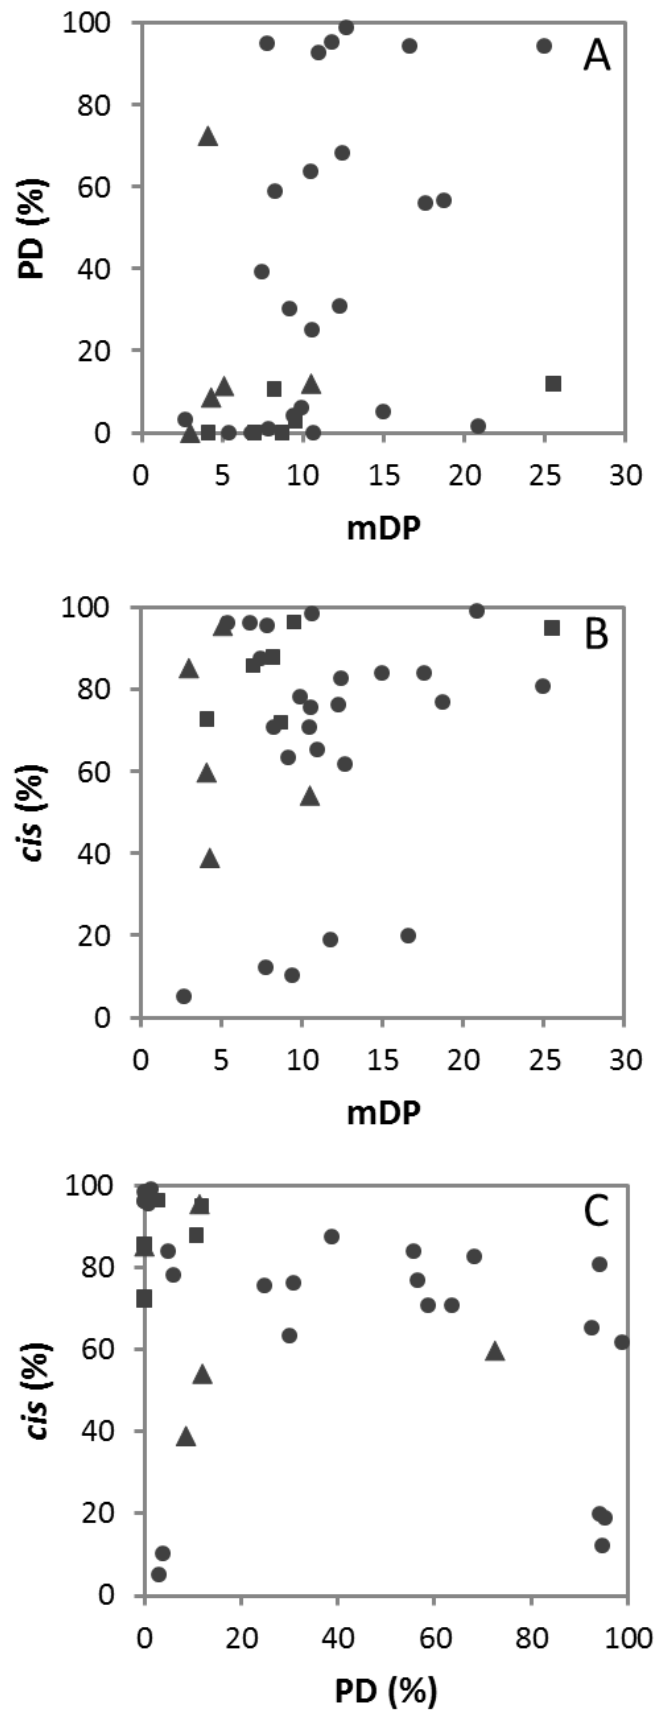

**S1 Fig. Lack of observed correlation between condensed tannin (CT) characteristics among all CT.** mDP – mean degree of polymerisation, PD – prodelphinidin, *cis* – *cis*-flavan-3-ols; ● – B-type CT, ▲ – B-type galloylated CT, ■ – B-type with A-type linkages; values corrected for CT content; (A) PD (%) versus mDP, ( $r_s=0.434$ ;  $p<0.01$ ;  $df=35$ ); (B) *cis* (%) versus mDP; (C) *cis* (%) versus PD (%), ( $r_s=-0.619$ ;  $p<0.01$ ;  $df=35$ ).
