# Supplementary material for: Identification of Structural Features of Condensed Tannins That Affect Protein Aggregation
Source: PubMed Central journal article supplement (PMC5268436; doi:10.1371/journal.pone.0170768), 2017-01-26
Supplement: pone.0170768.s002.pdf [file pone.0170768.s002.pdf]

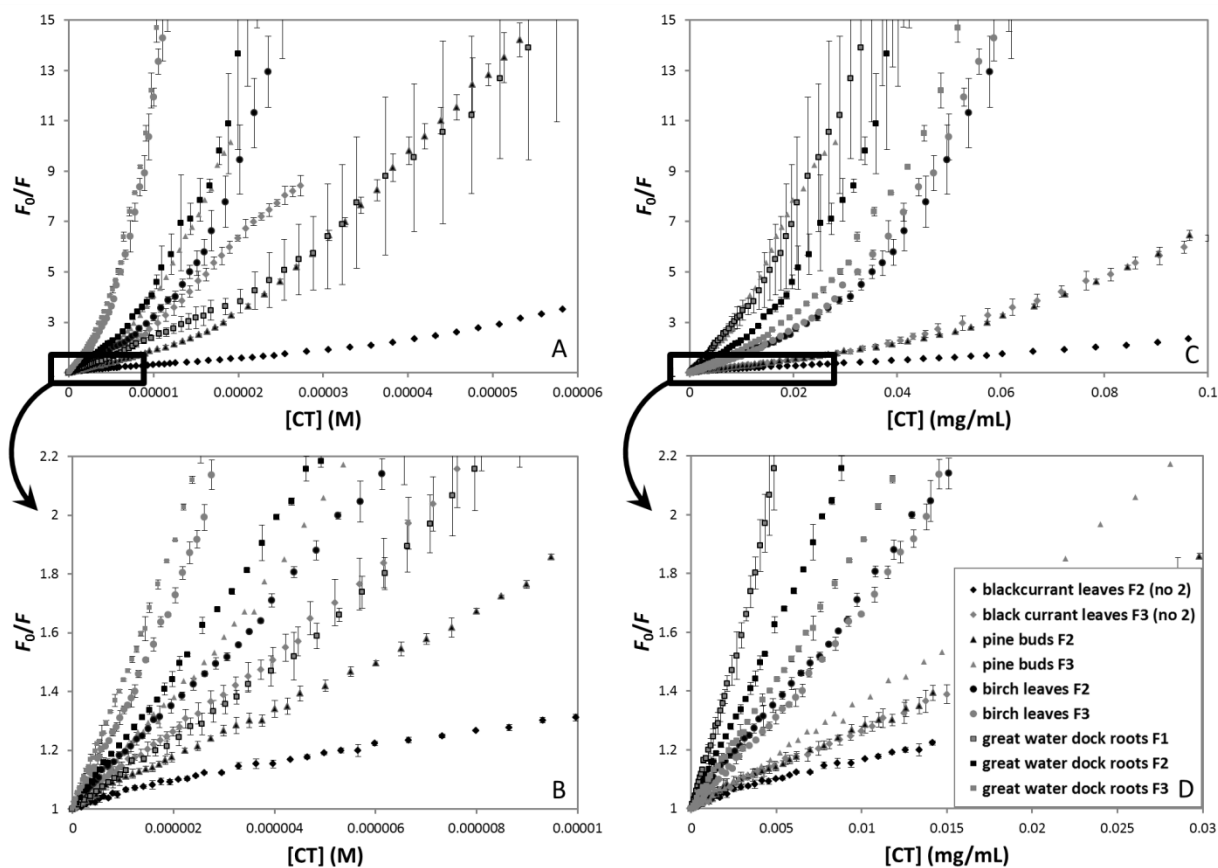

**S2 Fig. Fluorescence quenching of tryptophan in BSA by condensed tannins (CT), as Stern-Volmer plots.** Values corrected for CT content; error bars indicate standard deviation of repeats; (A) titration points of aliquots with increasing CT concentration (M); (B) titration points of aliquots with increasing CT concentration (M) at linear part of the plot (up to  $F_0/F \approx 2.2$ ) fitted to linear regression, all  $R^2 = 0.99-1.00$ ; (C) titration points of aliquots with increasing CT concentration (mg/mL); (D) titration points at linear part of the plot (up to  $F_0/F \approx 2.2$ ) fitted to linear regression, all  $R^2 = 0.99-1.00$ .
