# Supplementary material for: Identification of Structural Features of Condensed Tannins That Affect Protein Aggregation
Source: PubMed Central journal article supplement (PMC5268436; doi:10.1371/journal.pone.0170768), 2017-01-26
Supplement: pone.0170768.s003.pdf [file pone.0170768.s003.pdf]

**S1 Table. Composition of condensed tannins in terms of flavan-3-ol terminal and extension units (as molar percentages).**

*Note:* A few of these fractions were reported previously [4, 9] and are included for clarity purposes.

| CT fraction                           | Tannin subunit composition (%) |     |      |     |           |            |          |           |               |               |               |               |               |               |
|---------------------------------------|--------------------------------|-----|------|-----|-----------|------------|----------|-----------|---------------|---------------|---------------|---------------|---------------|---------------|
|                                       | GC                             | EGC | C    | EC  | GC<br>-BM | EGC<br>-BM | C<br>-BM | EC<br>-BM | ECg           | ECg<br>-BM    | GCg           | GCg<br>-BM    | EGCg          | EGCg<br>-BM   |
| Great water dock root F1 <sup>a</sup> | 0.0                            | 0.0 | 12.6 | 5.7 | 0.0       | 0.0        | 2.1      | 44.9      | 14.9          | 19.8          | nd            | nd            | nd            | nd            |
| ±                                     | 0.0                            | 0.0 | 0.2  | 0.2 | 0.0       | 0.0        | 0.2      | 0.1       | 0.1           | 0.1           |               |               |               |               |
| Great water dock root F1 <sup>b</sup> | 0.0                            | 0.0 | 27.8 | 8.7 | 0.0       | 0.0        | 1.3      | 30.0      | 19.0          | 13.2          | nd            | nd            | nd            | nd            |
| ±                                     | 0.0                            | 0.0 | 0.1  | 0.1 | 0.0       | 0.0        | 0.2      | 0.1       | 0.1           | 0.1           |               |               |               |               |
| Great water dock root F2              | 0.0                            | 0.0 | 4.1  | 0.8 | *         | 5.2        | 0.3      | 35.2      | 14.7          | 39.7          | nd            | nd            | nd            | nd            |
| ±                                     | 0.0                            | 0.0 | 0.1  | 0.1 | 0.0       | 0.1        | 0.3      | 0.1       | 0.1           | 0.1           |               |               |               |               |
| Great water dock root F3              | 0.0                            | 0.0 | 2.5  | 0.8 | 2.3       | 19.6       | 0.6      | 40.3      | 3.7           | 30.4          | nd            | nd            | nd            | nd            |
| ±                                     | 0.0                            | 0.0 | 0.0  | 0.1 | 0.3       | 0.1        | 0.4      | 0.1       | 0.0           | 0.1           |               |               |               |               |
| Hazelnut pericarp F1 <sup>a</sup>     | 1.0                            | 0.0 | 18.0 | 1.8 | 5.5       | 2.3        | 32.7     | 34.2      | 0.6           | 1.0           | nd            | nd            | nd            | nd            |
| ±                                     | 0.1                            | 0.0 | 0.0  | 0.0 | 0.1       | 0.2        | 0.1      | 0.1       | 0.1           | 0.1           |               |               |               |               |
| Hazelnut pericarp F1 <sup>b</sup>     | 0.9                            | 0.0 | 19.8 | 1.8 | 5.3       | 2.2        | 35.0     | 33.4      | 0.7           | 0.9           | nd            | nd            | nd            | nd            |
| ±                                     | 0.1                            | 0.0 | 0.0  | 0.0 | 0.1       | 0.2        | 0.1      | 0.1       | 0.1           | 0.1           |               |               |               |               |
| Hazelnut pericarp F2                  | 0.0                            | 0.0 | 7.9  | 0.8 | 6.0       | 5.6        | 32.0     | 44.1      | 0.9           | 2.8           | nd            | nd            | nd            | nd            |
| ±                                     | 0.0                            | 0.0 | 0.1  | 0.1 | 0.2       | 0.1        | 0.1      | 0.1       | 0.1           | 0.2           |               |               |               |               |
| Shea meal F2 [4]                      | 4.1                            | 2.5 | 1.1  | 0.0 | 20.7      | 9.4        | 3.5      | 12.6      | 12.6          | 6.6           | 3.8           | 6.1           | 9.8           | 16.0          |
| ±                                     | 0.1                            | 0.1 | 0.0  | 0.0 | 0.2       | 0.3        | 0.1      | 0.0       | 0.0           | 0.1           | 0.0           | 0.0           | 0.1           | 0.1           |
|                                       |                                |     |      |     |           |            |          |           | <b>PC</b>     | <b>PC</b>     | <b>PC</b>     | <b>PC</b>     | <b>PC</b>     | <b>PC</b>     |
|                                       |                                |     |      |     |           |            |          |           | <b>A-type</b> | <b>A-type</b> | <b>A-type</b> | <b>A-type</b> | <b>A-type</b> | <b>A-type</b> |
|                                       |                                |     |      |     |           |            |          |           | <b>trimer</b> | <b>trimer</b> | <b>dimer</b>  | <b>dimer</b>  | <b>trimer</b> | <b>dimer</b>  |
|                                       |                                |     |      |     |           |            |          |           | <b>I</b>      | <b>II</b>     | <b>I</b>      | <b>II</b>     | <b>-BM</b>    | <b>-BM</b>    |
| Bilberry leaf F2                      | 0.0                            | 1.0 | 1.3  | 8.5 | 0.7       | 0.8        | 1.2      | 81.0      | 0.7           | 0.0           | 0.0           | 0.0           | 2.3           | 2.5           |
| ±                                     | 0.0                            | 0.1 | 0.0  | 0.1 | 0.2       | 0.1        | 0.6      | 0.0       | 0.1           | 0.0           | 0.0           | 0.0           | 0.1           | 0.0           |
| Blackthorn flower F2                  | 0.0                            | 0.0 | 9.8  | 2.3 | 0.0       | 0.0        | 12.2     | 56.5      | 0.0           | 0.0           | 15.5          | 1.8           | 0.6           | 1.3           |
| ±                                     | 0.0                            | 0.0 | 0.1  | 0.1 | 0.0       | 0.0        | 0.2      | 0.1       | 0.0           | 0.0           | 0.1           | 0.2           | 0.1           | 0.2           |
| Cinnamon bark F2 [9]                  | 0.0                            | 0.0 | 6.8  | 3.1 | 0.0       | 0.0        | 4.6      | 66.6      | 5.7           | 1.2           | 1.8           | 0.0           | 4.6           | 5.5           |
| ±                                     | 0.0                            | 0.0 | 0.1  | 0.1 | 0.0       | 0.0        | 0.2      | 1.1       | 0.2           | 6.6           | 0.1           | 0.0           | 0.1           | 0.1           |
| Cowberry leaf F2                      | 0.0                            | 0.0 | 8.8  | 0.7 | 0.0       | 0.0        | 13.8     | 57.6      | 0.8           | *             | 4.1           | 0.3           | 7.2           | 6.8           |
| ±                                     | 0.0                            | 0.0 | 0.0  | 0.0 | 0.0       | 0.0        | 0.1      | 0.0       | 0.0           | 0.0           | 0.0           | 0.1           | 0.0           | 0.0           |
| Heather flower F2                     | 0.0                            | 0.0 | 7.9  | 3.0 | 0.0       | 9.9        | 3.2      | 68.7      | 2.6           | 0.8           | *             | *             | *             | 3.9           |

|                              |   |     |     |     |      |      |      |      |      |     |     |     |     |     |     |
|------------------------------|---|-----|-----|-----|------|------|------|------|------|-----|-----|-----|-----|-----|-----|
|                              | ± | 0.0 | 0.0 | 0.0 | 0.0  | 0.0  | 0.1  | 0.0  | 0.0  | 0.0 | 0.1 | 0.0 | 0.0 | 0.0 | 0.0 |
| Heather flower F3            |   | 0.0 | 0.0 | 2.7 | 1.0  | 0.0  | 11.8 | 2.2  | 81.1 | 0.4 | 0.2 | 0.0 | 0.0 | 0.0 | 0.8 |
|                              | ± | 0.0 | 0.0 | 0.0 | 0.0  | 0.0  | 0.1  | 0.1  | 0.0  | 0.0 | 0.0 | 0.0 | 0.0 | 0.0 | 0.0 |
| Birch leaf F2                |   | 4.4 | *   | 7.7 | *    | 11.0 | 43.6 | 6.3  | 27.1 | nd  | nd  | nd  | nd  | nd  | nd  |
|                              | ± | 0.1 | 0.0 | 0.1 | 0.0  | 0.1  | 0.1  | 0.1  | 0.1  |     |     |     |     |     |     |
| Birch leaf F3                |   | 2.0 | 0.0 | 3.5 | 0.2  | 9.4  | 50.9 | 5.0  | 29.1 | nd  | nd  | nd  | nd  | nd  | nd  |
|                              | ± | 0.1 | 0.0 | 0.1 | 0.4  | 0.1  | 0.0  | 0.0  | 0.0  |     |     |     |     |     |     |
| Blackcurrant leaf (no 1) F2  |   | 6.5 | 0.9 | 1.0 | 0.1  | 71.4 | 16.5 | 2.3  | 1.3  | nd  | nd  | nd  | nd  | nd  | nd  |
|                              | ± | 0.1 | 0.1 | 0.1 | 0.2  | 0.1  | 0.1  | 0.2  | 0.0  |     |     |     |     |     |     |
| Blackcurrant leaf (no. 2) F2 |   | 8.8 | 2.1 | 1.7 | 0.2  | 75.3 | 8.8  | 2.3  | 0.9  | nd  | nd  | nd  | nd  | nd  | nd  |
|                              | ± | 0.1 | 0.1 | 0.0 | 0.1  | 0.1  | 0.1  | 0.1  | 0.0  |     |     |     |     |     |     |
| Blackcurrant leaf (no. 2) F3 |   | 4.1 | 0.8 | 1.0 | 0.1  | 72.9 | 16.6 | 2.2  | 2.3  | nd  | nd  | nd  | nd  | nd  | nd  |
|                              | ± | 0.1 | 0.1 | 0.1 | 0.1  | 0.1  | 0.1  | 0.2  | 0.1  |     |     |     |     |     |     |
| Cider apple beverage F2      |   | 0.7 | 0.0 | 3.4 | 9.2  | 7.6  | 30.6 | 0.7  | 47.8 | nd  | nd  | nd  | nd  | nd  | nd  |
|                              | ± | 0.1 | 0.0 | 0.1 | 0.1  | 0.1  | 0.2  | 0.2  | 0.1  |     |     |     |     |     |     |
| Cider apple powder F2        |   | 0.0 | 0.0 | 3.7 | 11.1 | 0.0  | 0.0  | 0.0  | 85.2 | nd  | nd  | nd  | nd  | nd  | nd  |
|                              | ± | 0.0 | 0.0 | 0.0 | 0.1  | 0.0  | 0.0  | 0.0  | 0.1  |     |     |     |     |     |     |
| Cocoa bean F2                |   | 0.0 | 0.0 | 2.5 | 15.9 | 0.0  | 0.0  | 1.2  | 80.4 | nd  | nd  | nd  | nd  | nd  | nd  |
|                              | ± | 0.0 | 0.0 | 0.1 | 0.3  | 0.0  | 0.0  | 0.1  | 0.4  |     |     |     |     |     |     |
| Hawthorn flower F2           |   | 0.0 | 0.0 | 0.9 | 8.4  | 0.0  | 0.0  | 0.5  | 90.1 | nd  | nd  | nd  | nd  | nd  | nd  |
|                              | ± | 0.0 | 0.0 | 0.0 | 0.0  | 0.0  | 0.0  | 0.3  | 0.0  |     |     |     |     |     |     |
| Hop strobile F2              |   | 0.7 | *   | 7.5 | 1.2  | 3.8  | 20.5 | 12.4 | 53.8 | nd  | nd  | nd  | nd  | nd  | nd  |
|                              | ± | 0.1 | 0.0 | 0.1 | 0.1  | 0.1  | 0.1  | 0.1  | 0.0  |     |     |     |     |     |     |
| Lespedeza pellet F3          |   | 2.7 | 1.1 | 0.2 | 0.1  | 15.3 | 75.4 | 1.1  | 4.3  | nd  | nd  | nd  | nd  | nd  | nd  |
|                              | ± | 0.1 | 0.0 | 0.0 | 0.0  | 0.1  | 0.1  | 0.1  | 0.1  |     |     |     |     |     |     |
| Pine bud F2                  |   | 3.6 | 0.4 | 5.1 | 0.4  | 10.7 | 49.2 | 10.0 | 20.7 | nd  | nd  | nd  | nd  | nd  | nd  |
|                              | ± | 0.1 | 0.1 | 0.1 | 0.2  | 0.1  | 0.1  | 0.1  | 0.1  |     |     |     |     |     |     |
| Pine bud F3                  |   | 1.7 | 0.0 | 3.2 | 0.8  | 4.0  | 50.1 | 7.3  | 33.0 | nd  | nd  | nd  | nd  | nd  | nd  |
|                              | ± | 0.2 | 0.0 | 0.1 | 0.1  | 0.4  | 0.1  | 0.1  | 0.1  |     |     |     |     |     |     |
| Redcurrant leaf F2           |   | 6.1 | 0.6 | 2.0 | 0.3  | 24.8 | 60.9 | 1.8  | 3.5  | nd  | nd  | nd  | nd  | nd  | nd  |
|                              | ± | 0.1 | 0.1 | 0.1 | 0.1  | 0.1  | 0.1  | 0.2  | 0.1  |     |     |     |     |     |     |
| Sainfoin aerial part F2      |   | 2.1 | 1.6 | 2.4 | 1.9  | 10.4 | 54.2 | 2.5  | 24.9 | nd  | nd  | nd  | nd  | nd  | nd  |
|                              | ± | 0.1 | 0.1 | 0.1 | 0.1  | 0.1  | 0.1  | 0.1  | 0.1  |     |     |     |     |     |     |
| <i>Tilia</i> flower F2       |   | *   | *   | 2.3 | 10.4 | *    | 0.9  | 2.1  | 84.3 | nd  | nd  | nd  | nd  | nd  | nd  |
|                              | ± | 0.0 | 0.0 | 0.1 | 0.1  | 0.0  | 0.2  | 0.3  | 0.1  |     |     |     |     |     |     |
| <i>Tilia</i> flower F3       |   | 0.0 | 0.0 | 1.0 | 3.8  | 0.0  | 1.4  | *    | 93.8 | nd  | nd  | nd  | nd  | nd  | nd  |
|                              | ± | 0.0 | 0.0 | 0.2 | 0.2  | 0.0  | 0.3  | 0.0  | 0.2  |     |     |     |     |     |     |
| Walnut leaf F2               |   | 0.7 | 0.0 | 6.7 | 0.6  | 6.3  | 23.9 | 10.0 | 51.7 | nd  | nd  | nd  | nd  | nd  | nd  |

|                        |   |     |     |      |     |      |      |      |      |    |    |    |    |    |    |
|------------------------|---|-----|-----|------|-----|------|------|------|------|----|----|----|----|----|----|
|                        | ± | 0.3 | 0.0 | 0.1  | 0.1 | 0.1  | 0.0  | 0.1  | 0.1  |    |    |    |    |    |    |
| Walnut leaf F3         |   | 1.2 | 0.5 | 3.3  | 0.4 | 13.0 | 41.9 | 5.7  | 34.0 | nd | nd | nd | nd | nd | nd |
|                        | ± | 0.1 | 0.2 | 0.1  | 0.1 | 0.1  | 0.1  | 0.3  | 0.1  |    |    |    |    |    |    |
| White clover flower F2 |   | 6.1 | 1.8 | *    | 0.0 | 31.7 | 59.2 | 0.3  | 0.8  | nd | nd | nd | nd | nd | nd |
|                        | ± | 0.0 | 0.0 | 0.0  | 0.0 | 0.1  | 0.0  | 0.0  | 0.0  |    |    |    |    |    |    |
| Willow bark F2         |   | *   | 0.0 | 9.7  | 0.4 | 0.9  | 5.1  | 11.3 | 72.6 | nd | nd | nd | nd | nd | nd |
|                        | ± | 0.0 | 0.0 | 0.0  | 0.1 | 0.1  | 0.1  | 0.0  | 0.1  |    |    |    |    |    |    |
| Willow bark F3         |   | 0.0 | 0.0 | 6.3  | 0.3 | 0.7  | 4.2  | 9.1  | 79.4 | nd | nd | nd | nd | nd | nd |
|                        | ± | 0.0 | 0.0 | 0.1  | 0.1 | 0.1  | 0.2  | 0.1  | 0.1  |    |    |    |    |    |    |
| Yellow iris leaf F2    |   | 0.0 | 0.0 | 10.3 | 0.5 | 0.8  | 29.4 | 25.6 | 33.4 | nd | nd | nd | nd | nd | nd |
|                        | ± | 0.0 | 0.0 | 0.1  | 0.1 | 0.0  | 0.1  | 0.1  | 0.1  |    |    |    |    |    |    |

<sup>a</sup> corrected for free flavan-3-ols; <sup>b</sup> not corrected for free flavan-3-ols (for comparison purposes only); ± standard deviation; \* trace amounts detected; <sup>nd</sup> not detected; CT – condensed tannin; GC – galliccatechin, EGC – epigallocatechin, C – catechin, EC – epicatechin, GC-BM – galliccatechin benzyl mercaptan adduct, EGC-BM – epigallocatechin benzyl mercaptan adduct, C-BM – catechin benzyl mercaptan adduct, EC-BM – epicatechin benzyl mercaptan adduct, ECg – epicatechin gallate, ECg-BM – epicatechin gallate benzyl mercaptan adduct, GCg – galliccatechin gallate, GCg – galliccatechin gallate benzyl mercaptan adduct, PC – procyanidins.
